# Supplementary material
Source: publisher figshare collection journal article supplement (https://gsajournals.figshare.com/ndownloader/files/30829513)
Supplement: Supplementary file 1 [file 30829513]

ID	Indiv_Geo	Indiv_Ln_Geo	Year	Tail	Fam	Mean_Geosmin	Mean_Geo_Act_Yr	Mean_Ln_Geosmin	Mean_Ln_Geo_Act_Yr
1847-1	0.77	-0.26	2019	Low	4027	2.8	2.42	0.9	0.73
310B-2	1.18	0.17	2017	Low	4002	3.22	1.44	1.02	0.35
113A-1	1.56	0.44	2017	Low	4000	5.58	4.29	1.5	1.2
1780-1	1.69	0.52	2019	Low	4105	3.48	3.04	1.17	1.05
310B-1	1.71	0.54	2017	Low	4002	3.22	1.44	1.02	0.35
689A-1	1.86	0.62	2017	Low	4052	5.56	5.05	1.55	1.46
1809-1	2.04	0.71	2019	Low	4086	4.02	4.23	1.32	1.34
1727-1	2.05	0.72	2019	Low	4053	4.64	4.06	1.47	1.26
707A-2	2.14	0.76	2017	Low	4027	2.8	3.32	0.9	1.13
094A-1	2.14	0.76	2017	Low	4105	3.48	3.93	1.17	1.29
1766-2	2.16	0.77	2019	Low	4001	4.06	3.62	1.36	1.25
512B-2	2.23	0.8	2017	Low	4144	4.14	4.21	1.33	1.32
1862-2	2.25	0.81	2019	Low	4120	4.16	3.68	1.38	1.25
1847-2	2.34	0.85	2019	Low	4027	2.8	2.42	0.9	0.73
1868-2	2.36	0.86	2019	Low	4002	3.22	4.11	1.02	1.36
1715-2	2.43	0.89	2019	Low	4037	3.92	4.08	1.31	1.33
1824-1	2.49	0.91	2019	Low	4144	4.14	4.1	1.33	1.34
309B-1	2.51	0.92	2017	Low	4131	5.08	4.53	1.55	1.46
1780-2	2.62	0.96	2019	Low	4105	3.48	3.04	1.17	1.05
1824-2	2.69	0.99	2019	Low	4144	4.14	4.1	1.33	1.34
1742-2	2.78	1.02	2019	Low	4027	2.8	2.42	0.9	0.73
104B-1	2.79	1.03	2017	Low	4047	3.75	3.49	1.29	1.24
500B-1	2.8	1.03	2017	Low	4027	2.8	3.32	0.9	1.13
1862-1	2.84	1.04	2019	Low	4120	4.16	3.68	1.38	1.25
104A-2	2.86	1.05	2017	Low	4086	4.02	3.81	1.32	1.31
503B-1	2.89	1.06	2017	Low	4086	4.02	3.81	1.32	1.31
1855-2	2.91	1.07	2019	Low	4037	3.92	4.08	1.31	1.33
506B-1	2.95	1.08	2017	Low	4001	4.06	4.5	1.36	1.47
1728-1	3.16	1.15	2019	Low	4047	3.75	4.02	1.29	1.34
690B-2	3.18	1.16	2017	Low	4037	3.92	3.61	1.31	1.27
1748-2	3.28	1.19	2019	Low	4086	4.02	4.23	1.32	1.34
498A-1	3.38	1.22	2017	Low	4047	3.75	3.49	1.29	1.24
1868-1	3.46	1.24	2019	Low	4002	3.22	4.11	1.02	1.36
104B-2	3.54	1.26	2017	Low	4047	3.75	3.49	1.29	1.24
1883-1	3.65	1.29	2019	Low	4001	4.06	3.62	1.36	1.25
1793-2	3.65	1.29	2019	Low	4105	3.48	3.04	1.17	1.05
1742-1	3.77	1.33	2019	Low	4027	2.8	2.42	0.9	0.73
111B-1	3.94	1.37	2017	Low	4105	3.48	3.93	1.17	1.29
690B-1	4.03	1.39	2017	Low	4037	3.92	3.61	1.31	1.27
1728-2	4.17	1.43	2019	Low	4047	3.75	4.02	1.29	1.34
1793-1	4.18	1.43	2019	Low	4105	3.48	3.04	1.17	1.05
498A-2	4.26	1.45	2017	Low	4047	3.75	3.49	1.29	1.24
104A-1	4.6	1.53	2017	Low	4086	4.02	3.81	1.32	1.31
1814-2	12.26	2.51	2019	High	4160	18.9	18.49	2.82	2.86
1814-1	13.11	2.57	2019	High	4160	18.9	18.49	2.82	2.86
1759-2	16.21	2.79	2019	High	4055	20.64	20.24	3	2.98
1746-1	16.69	2.81	2019	High	4064	21.43	23.96	3.01	3.15
106A-1	17.13	2.84	2017	High	4143	18.18	18.48	2.85	2.87
1859-1	17.37	2.85	2019	High	4055	20.64	20.24	3	2.98
1865-1	17.37	2.85	2019	High	4124	21.01	16.96	2.97	2.82
690A-2	17.66	2.87	2017	High	4078	16.97	17.63	2.79	2.81
1865-2	17.85	2.88	2019	High	4124	21.01	16.96	2.97	2.82
498B-2	18.15	2.9	2017	High	4162	16.54	18.28	2.77	2.9
1831-2	18.27	2.91	2019	High	4125	17.81	19.13	2.84	2.92
1891-2	18.53	2.92	2019	High	4167	17.92	18.59	2.77	2.9
498B-1	18.58	2.92	2017	High	4162	16.54	18.28	2.77	2.9
1859-2	19.14	2.95	2019	High	4055	20.64	20.24	3	2.98
304B-1	19.24	2.96	2017	High	4133	17.03	16.94	2.79	2.78
706B-2	19.35	2.96	2017	High	4125	17.81	15.17	2.84	2.68
1817-2	19.53	2.97	2019	High	4143	18.18	17.88	2.85	2.84
297B-2	19.65	2.98	2017	High	4064	21.43	18.91	3.01	2.88
1738-2	20.03	3	2019	High	4124	21.01	16.96	2.97	2.82
1791-1	20.33	3.01	2019	High	4167	17.92	18.59	2.77	2.9
1746-2	20.52	3.02	2019	High	4064	21.43	23.96	3.01	3.15
1711-2	22.08	3.09	2019	High	4160	18.9	18.49	2.82	2.86
303B-2	22.12	3.1	2017	High	4143	18.18	18.48	2.85	2.87
1764-2	22.18	3.1	2019	High	4125	17.81	19.13	2.84	2.92
101B-2	22.47	3.11	2017	High	4167	17.92	17.02	2.77	2.59
1891-1	22.51	3.11	2019	High	4167	17.92	18.59	2.77	2.9
1776-2	22.72	3.12	2019	High	4078	16.97	16.31	2.79	2.77
1831-1	24.11	3.18	2019	High	4125	17.81	19.13	2.84	2.92
303B-1	24.18	3.19	2017	High	4143	18.18	18.48	2.85	2.87
101B-1	24.29	3.19	2017	High	4167	17.92	17.02	2.77	2.59
304B-2	24.55	3.2	2017	High	4133	17.03	16.94	2.79	2.78
297A-2	25.28	3.23	2017	High	4054	17.03	14.45	2.76	2.58
1775-2	25.44	3.24	2019	High	4143	18.18	17.88	2.85	2.84
1854-1	25.76	3.25	2019	High	4133	17.03	17.12	2.79	2.8
706A-1	25.98	3.26	2017	High	4055	20.64	21.46	3	3.04
1711-1	26.51	3.28	2019	High	4160	18.9	18.49	2.82	2.86
1878-2	26.92	3.29	2019	High	4064	21.43	23.96	3.01	3.15
502B-2	27.84	3.33	2017	High	4078	16.97	17.63	2.79	2.81
1759-1	28.23	3.34	2019	High	4055	20.64	20.24	3	2.98
705A-2	29.71	3.39	2017	High	4064	21.43	18.91	3.01	2.88
1878-1	31.71	3.46	2019	High	4064	21.43	23.96	3.01	3.15
098A-1	34.31	3.54	2017	High	4124	21.01	25.05	2.97	3.12
098A-2	36.75	3.6	2017	High	4124	21.01	25.05	2.97	3.12
295B-1	41.6	3.73	2017	High	4160	18.9	19.32	2.82	2.78
